# Supplementary material for: Surface-Pt-rich AgPtAu trimetallic nanotrough arrays for boosting alcohol electrooxidation
Source: Royal Society of Chemistry journal article supplement (doi:10.1039/d3gc00596h), 2023-01-01
Supplement: d3gc00596h1.pdf [file d3gc00596h1.pdf]

## Surface-Pt-rich AgPtAu trimetallic nanotrough array for boosting alcohol electrooxidation

Jing-Jing Li,<sup>a</sup> Wen-Chao Geng,<sup>b</sup> Ling Jiang<sup>a</sup> and Yong-Jun Li<sup>\*a</sup>

<sup>a</sup> State Key Lab of Chemo/Biosensing and Chemometrics, College of Chemistry and Chemical Engineering, Hunan University, Changsha 410082, China. E-mail: liyje@hnu.edu.cn; Tel: +86-731-88821603

<sup>b</sup> School of Chemical and Printing-Dyeing Engineering, Henan University of Engineering, Zhengzhou 450000, China

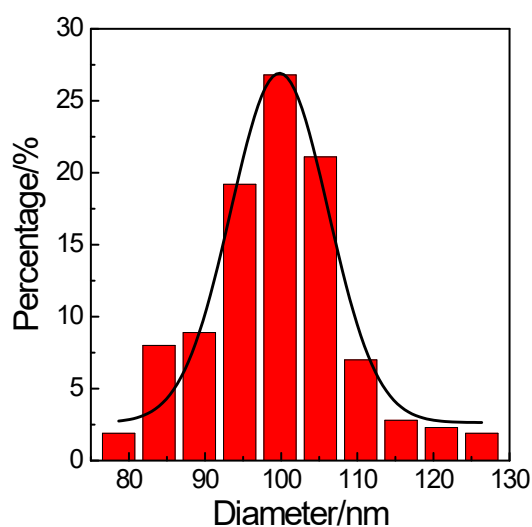

**Fig. S1** Diameter distribution of Ag nanowires.

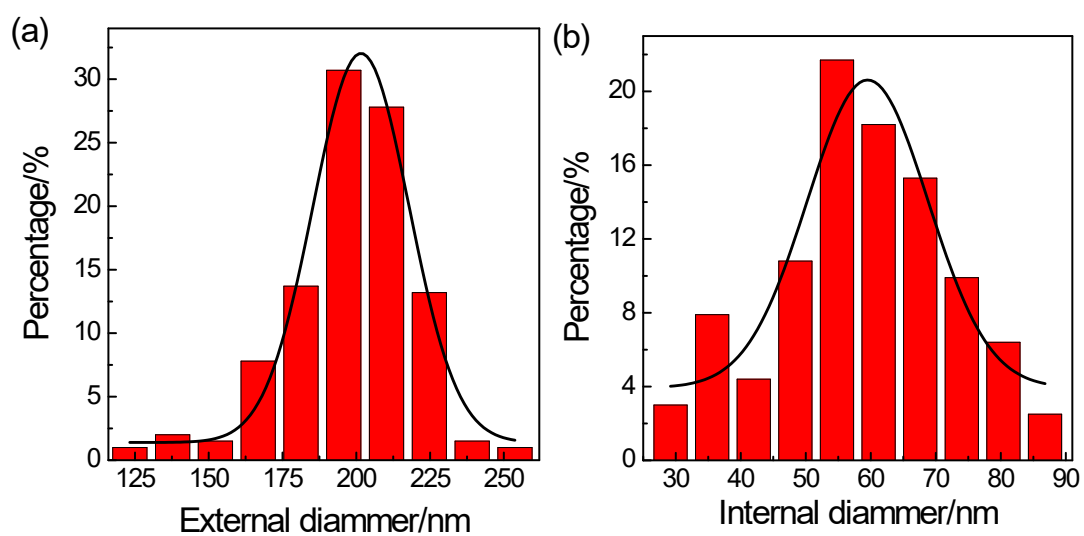

**Fig. S2** External (a) and internal (b) diameter distribution of  $\text{Ag}_{11}\text{Pt}_5\text{Au}_{84}$ .

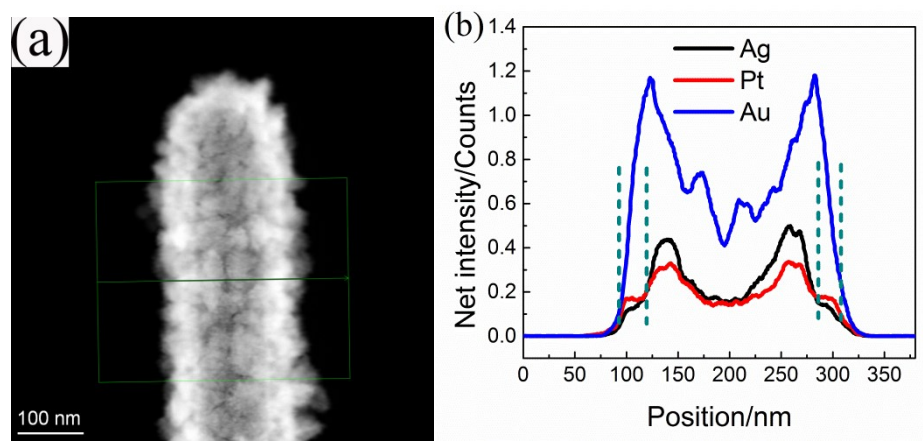

**Fig. S3** HAADF image (a) and linear scan element-distribution profile (b) of  $\text{Ag}_{11}\text{Pt}_5\text{Au}_{84}$  nanostructure.

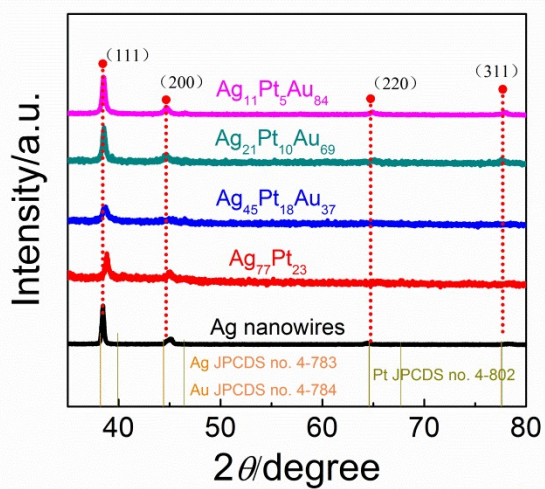

**Fig. S4** XRD patterns of Ag nanowires, Ag<sub>77</sub>Pt<sub>23</sub>, Ag<sub>45</sub>Pt<sub>18</sub>Au<sub>37</sub>, Ag<sub>21</sub>Pt<sub>10</sub>Au<sub>69</sub> and Ag<sub>11</sub>Pt<sub>5</sub>Au<sub>84</sub> nanostructure. For comparison, standard diffraction peak centers of Ag (JCPDS no. 4-783), Au (JCPDS no. 4-784), and Pt (JCPDS no. 4-802) were marked.

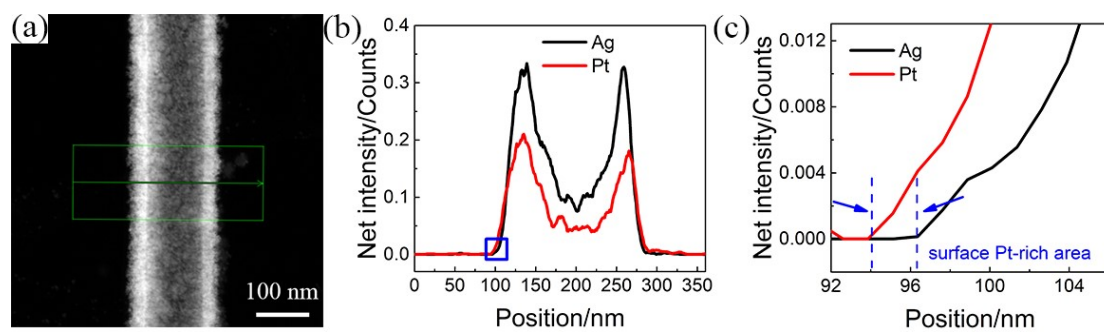

**Fig. S5** HAADF image (a) and linear scan element-distribution profile (b,c) of  $Ag_{77}Pt_{23}$  nanostructure. Graph c is the enlargement of the part of graph b, as marked in blue box in graph b.

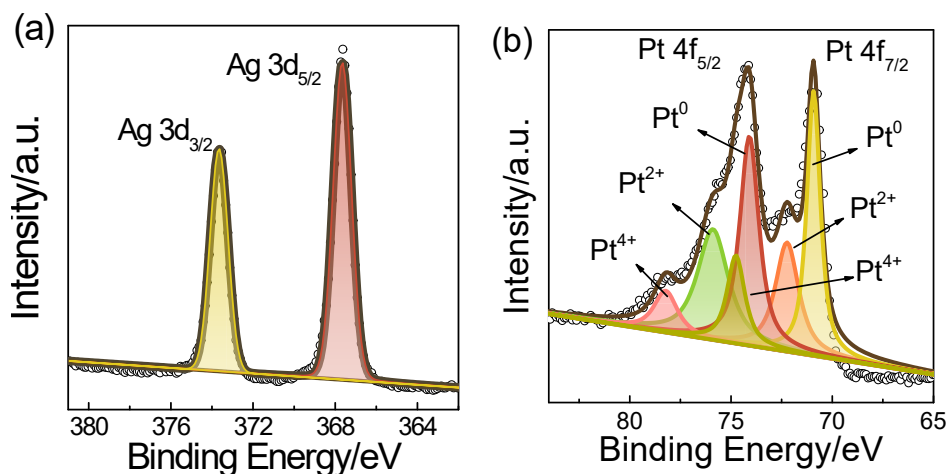

**Fig. S6** XPS spectra of Ag 3d (a) and Pt 4f (b) of Ag<sub>77</sub>Pt<sub>23</sub>. The black circle and the brown solid curves are the original data and the fitted curves, respectively, and other colorful curves are the deconvoluted ones.

XPS characterization shows that the energy band of Ag of Ag<sub>77</sub>Pt<sub>23</sub> is perfectly symmetrical, consistent with the standard patterns of Ag<sup>0</sup> 3d and Au<sup>0</sup> 4f,<sup>1</sup> indicating that Ag species is in the metallic state. Nevertheless, compared with Ag nanowire (Ag 3d<sub>5/2</sub>, 367.4 eV; 3d<sub>3/2</sub>, 373.4 eV),<sup>2</sup> Ag 3d<sub>5/2</sub> and 3d<sub>3/2</sub> of Ag<sub>77</sub>Pt<sub>23</sub> are located at higher energy (Fig. S6a); Pt<sup>0</sup> 4f<sub>7/2</sub> and 4f<sub>5/2</sub> binding energy bands are centered at 70.88 and 74.25 eV, respectively (Fig. S6b), ~0.32 eV shift towards the lower energy direction when compared with pure Pt (4f<sub>7/2</sub>, 71.20 eV; 4f<sub>5/2</sub>, 74.53 eV). These results indicate that, due to the small electronegativity of Ag (1.93),<sup>3</sup> more electrons accumulate around Pt,<sup>4</sup> which may modify the electronic structure of Ag<sub>77</sub>Pt<sub>23</sub>, helpful for improving the tolerance of Pt towards CO-like species.<sup>5, 6</sup> Additionally, Pt 4f binding energy shows shoulder bands owing to the existence of Pt<sup>2+</sup> and Pt<sup>4+</sup>, which can be attributed to platinum oxide.<sup>7</sup>

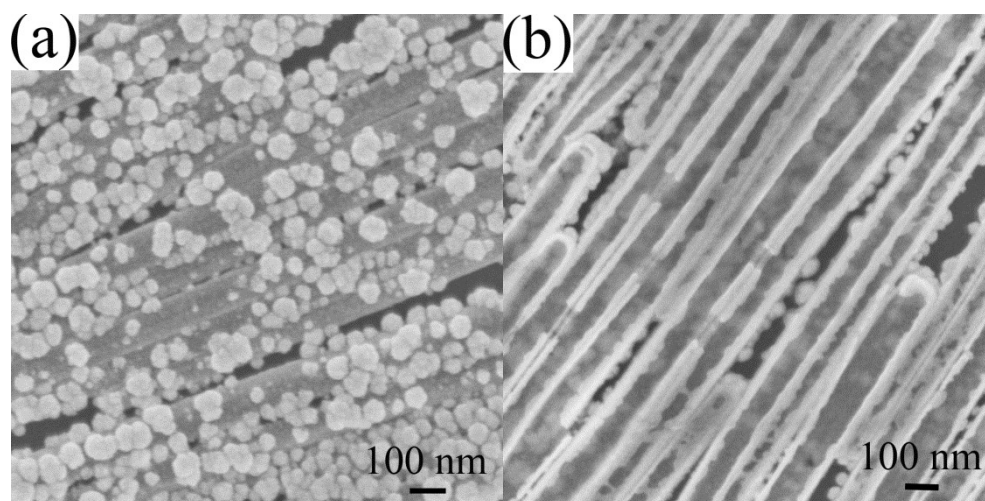

**Fig. S7** SEM image of AgPtAu nanostructure with high-purified Ag nanowires as the starting material: the bottom side (a) and top side (b).

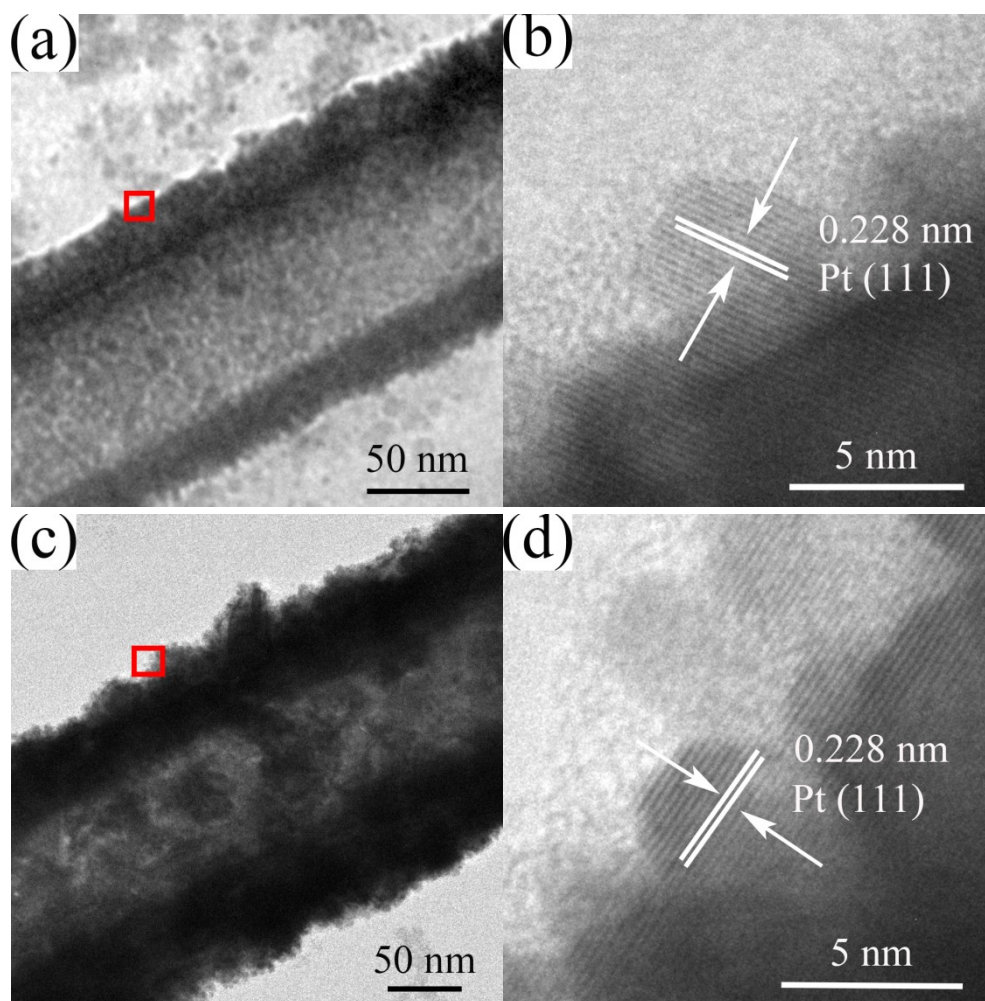

**Fig. S8** TEM (a,c) and HRTEM (b,d) images of Ag<sub>45</sub>Pt<sub>18</sub>Au<sub>37</sub> (a,b) and Ag<sub>21</sub>Pt<sub>10</sub>Au<sub>69</sub> (c,d).



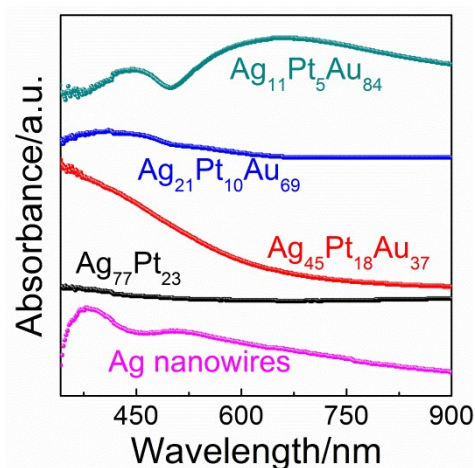

**Fig. S9** UV-vis spectra of Ag nanowire, Ag<sub>77</sub>Pt<sub>23</sub>, Ag<sub>45</sub>Pt<sub>18</sub>Au<sub>37</sub>, Ag<sub>21</sub>Pt<sub>10</sub>Au<sub>69</sub>, and Ag<sub>11</sub>Pt<sub>5</sub>Au<sub>84</sub> redispersed in ethanol.

Ag nanowire shows two absorption peaks centered at  $\sim 378.6$  and  $516.0$  nm, corresponding to its transversal and longitudinal plasma resonances,<sup>8</sup> respectively. By contrast, Ag<sub>77</sub>Pt<sub>23</sub> almost does not show any absorption owing to the damping effect of Pt.<sup>9, 10</sup> Although the introduction of Au into Ag<sub>77</sub>Pt<sub>23</sub> reduces the content of Ag, it simultaneously decreases the content of Pt, lowering the damping effect of Pt. Composition-varied AgPtAu nanostructures show different absorption features. Ag<sub>45</sub>Pt<sub>18</sub>Au<sub>37</sub> shows a broad absorption between  $\sim 360$  and  $650$  nm, the part of which lower than  $450$  nm may be attributed to Ag transversal plasma resonance and the part of which larger than  $450$  nm may be attributed to Au plasma resonance. With the increase of Au content, a well-defined absorption pattern is obtained for Ag<sub>11</sub>Pt<sub>5</sub>Au<sub>84</sub>.

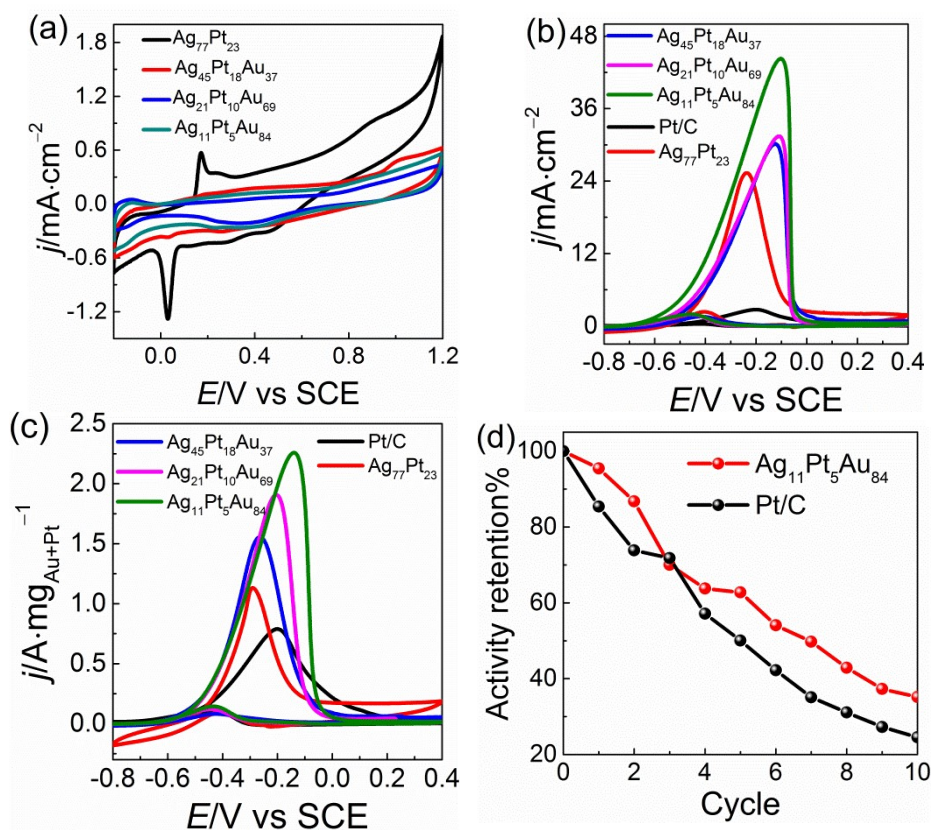

**Fig. S10** ECSA- (a) cyclic voltammograms for Pt/C,  $\text{Ag}_{77}\text{Pt}_{23}$ ,  $\text{Ag}_{45}\text{Pt}_{18}\text{Au}_{37}$ ,  $\text{Ag}_{21}\text{Pt}_{10}\text{Au}_{69}$ , and  $\text{Ag}_{11}\text{Pt}_5\text{Au}_{84}$  in  $N_2$ -saturated  $0.5 \text{ mol L}^{-1} \text{ H}_2\text{SO}_4$ ,  $50 \text{ mV s}^{-1}$ ; ECSA- (b) and mass-normalized (c) cyclic voltammograms for Pt/C,  $\text{Ag}_{77}\text{Pt}_{23}$ ,  $\text{Ag}_{45}\text{Pt}_{18}\text{Au}_{37}$ ,  $\text{Ag}_{21}\text{Pt}_{10}\text{Au}_{69}$ , and  $\text{Ag}_{11}\text{Pt}_5\text{Au}_{84}$  in  $N_2$ -saturated  $1.0 \text{ mol L}^{-1} \text{ KOH} + 1.0 \text{ mol L}^{-1} \text{ CH}_3\text{OH}$ ,  $50 \text{ mV s}^{-1}$ ; (d) activity retention of Pt/C and  $\text{Ag}_{11}\text{Pt}_5\text{Au}_{84}$  based on the cyclic voltammetric data of each operation cycle in  $N_2$ -saturated  $1.0 \text{ mol L}^{-1} \text{ KOH} + 1.0 \text{ mol L}^{-1} \text{ CH}_3\text{OH}$  (900 s amperometric measurement and subsequently a cyclic voltammetric sweeping from  $-0.40$  to  $0.80 \text{ V}$  as an operation cycle).

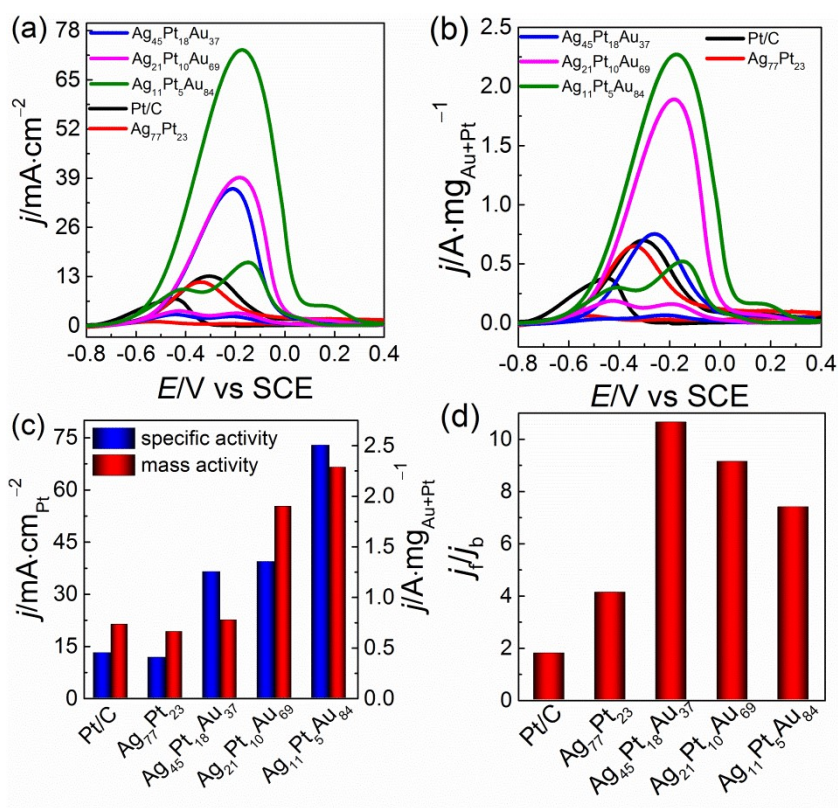

**Fig. S11** ECSA- (a) and mass-normalized (b) cyclic voltammograms for Pt/C, Ag<sub>77</sub>Pt<sub>23</sub>, Ag<sub>45</sub>Pt<sub>18</sub>Au<sub>37</sub>, Ag<sub>21</sub>Pt<sub>10</sub>Au<sub>69</sub>, and Ag<sub>11</sub>Pt<sub>5</sub>Au<sub>84</sub> in N<sub>2</sub>-saturated 1.0 mol L<sup>-1</sup> KOH + 1.0 mol L<sup>-1</sup> CH<sub>3</sub>CH<sub>2</sub>OH, 50 mV s<sup>-1</sup>; (c) summary of specific activity of Pt/C, Ag<sub>77</sub>Pt<sub>23</sub>, Ag<sub>45</sub>Pt<sub>18</sub>Au<sub>37</sub>, Ag<sub>21</sub>Pt<sub>10</sub>Au<sub>69</sub>, and Ag<sub>11</sub>Pt<sub>5</sub>Au<sub>84</sub> towards methanol oxidation; (d) comparison of  $j_t/j_b$  of mass-normalized cyclic voltammograms.

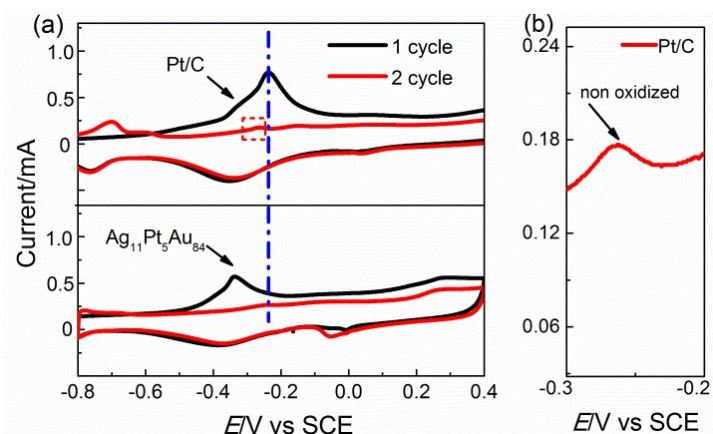

**Fig. S12** Cyclic voltammograms of CO-saturated adsorbed Ag<sub>11</sub>Pt<sub>5</sub>Au<sub>84</sub> nanotrough array and CO-saturated adsorbed Pt/C in 1.0 mol·L<sup>-1</sup> KOH ( $\nu = 50 \text{ mV}\cdot\text{s}^{-1}$ ).

Excellent anti-poisoning ability of Ag<sub>11</sub>Pt<sub>5</sub>Au<sub>84</sub> is further confirmed by CO stripping experiments (Fig. S12). CO oxidation peak is centered at -0.33 V at Ag<sub>11</sub>Pt<sub>5</sub>Au<sub>84</sub>, ~100 mV negative than that of commercial Pt/C (-0.23 V) (Fig. S12a), suggesting that CO desorption is much easier from Ag<sub>11</sub>Pt<sub>5</sub>Au<sub>84</sub>. In the second cycle, CO characteristic peak completely disappears at Ag<sub>11</sub>Pt<sub>5</sub>Au<sub>84</sub> whereas it does not at Pt/C, indicating that Ag<sub>11</sub>Pt<sub>5</sub>Au<sub>84</sub> is capable of oxidizing CO completely (Fig. S12b).

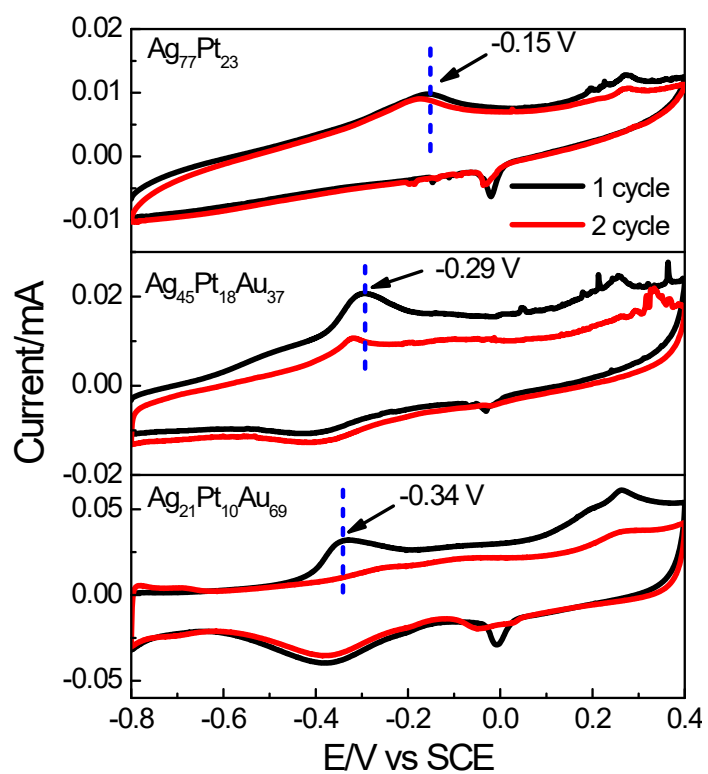

**Fig. S13** Cyclic voltammograms of CO-saturated adsorbed Ag<sub>77</sub>Pt<sub>23</sub>, Ag<sub>45</sub>Pt<sub>18</sub>Au<sub>37</sub>, Ag<sub>21</sub>Pt<sub>10</sub>Au<sub>69</sub> nanotrrough array in 1.0 mol·L<sup>-1</sup> KOH ( $\nu = 50 \text{ mV}\cdot\text{s}^{-1}$ ).

**Table S1.** The atomic ratios of AgPt and AgPtAu samples determined by ICP-OES technique.

| Catalyst                                     | Volume ( $\mu\text{L}$ )  |                  | Atomic ratio |
|----------------------------------------------|---------------------------|------------------|--------------|
|                                              | $\text{H}_2\text{PtCl}_6$ | $\text{HAuCl}_4$ | Ag:Pt:Au     |
| $\text{Ag}_{77}\text{Pt}_{23}$               | 35                        | 0                | 77:23:0      |
| $\text{Ag}_{45}\text{Pt}_{18}\text{Au}_{37}$ | 35                        | 20               | 45:18:37     |
| $\text{Ag}_{21}\text{Pt}_{10}\text{Au}_{69}$ | 35                        | 50               | 21:10:69     |
| $\text{Ag}_{11}\text{Pt}_5\text{Au}_{84}$    | 35                        | 100              | 11:5:84      |

**Table S2.** Catalyst loading of different elements (which were determined by ICP-OES) on the surface of the glassy carbon electrode and its electrochemical active surface area (ECSA) toward alcohol in the alkaline solution.

| Catalyst                                           | catalyst loading of Au/ $\mu\text{g}$ | catalyst loading of Pt/ $\mu\text{g}$ | ECSA/ $\text{m}^2 \text{g}_{\text{Pt}}^{-1}$ |
|----------------------------------------------------|---------------------------------------|---------------------------------------|----------------------------------------------|
| Pt/C                                               | /                                     | 5                                     | 29                                           |
| Ag <sub>77</sub> Pt <sub>23</sub>                  | /                                     | 0.254                                 | 5.4                                          |
| Ag <sub>45</sub> Pt <sub>18</sub> Au <sub>37</sub> | 0.629                                 | 0.293                                 | 35.6                                         |
| Ag <sub>21</sub> Pt <sub>10</sub> Au <sub>69</sub> | 2.696                                 | 0.373                                 | 39.7                                         |
| Ag <sub>11</sub> Pt <sub>5</sub> Au <sub>84</sub>  | 3.853                                 | 0.217                                 | 55                                           |

**Table S3.** Summary of the electrocatalytic oxidation performance of AgPtAu nanostructure in our case and other previously reported catalysts towards methanol in the alkaline solution.

| Catalyst                                           | ECSA-normalized activity ( $\text{mA}\cdot\text{cm}^{-2}$ ) | Mass-normalized activity                 | Reference |
|----------------------------------------------------|-------------------------------------------------------------|------------------------------------------|-----------|
| Au/Ag/Pt alloy nanoparticles                       | 0.13                                                        | $1.699 \text{ A mg}_{\text{Pt}}^{-1}$    | 11        |
| Au/Ag/Pt hetero-nanostructure                      | 1.40                                                        | $1 \text{ A mg}_{\text{Pt}}^{-1}$        | 12        |
| 3D Pt/C composite                                  | /                                                           | $0.426 \text{ A mg}_{\text{Pt}}^{-1}$    | 13        |
| Au@AgPt yolk-shell nanoparticles                   | 0.7                                                         | $0.9 \text{ A mg}_{\text{Pt}}^{-1}$      | 14        |
| AgAu@Pt nanoframes                                 | /                                                           | $0.483 \text{ A mg}_{\text{Pt}}^{-1}$    | 15        |
| Pt-nanoporous gold Au leaf                         | 1.65                                                        | $1.06 \text{ A mg}_{\text{Pt}}^{-1}$     | 16        |
| Pt/C                                               | 2.8                                                         | $0.796 \text{ A mg}_{\text{Pt}}^{-1}$    | This work |
| Ag <sub>77</sub> Pt <sub>23</sub>                  | 25.32                                                       | $1.137 \text{ A mg}_{\text{Au+Pt}}^{-1}$ | This work |
| Ag <sub>45</sub> Pt <sub>18</sub> Au <sub>37</sub> | 30.26                                                       | $1.565 \text{ A mg}_{\text{Au+Pt}}^{-1}$ | This work |
| Ag <sub>21</sub> Pt <sub>10</sub> Au <sub>69</sub> | 31.59                                                       | $1.919 \text{ A mg}_{\text{Au+Pt}}^{-1}$ | This work |
| Ag <sub>11</sub> Pt <sub>5</sub> Au <sub>84</sub>  | 44.00                                                       | $2.26 \text{ A mg}_{\text{Au+Pt}}^{-1}$  | This work |



**Table S4.** Summary of the electrocatalytic oxidation performance of AgPtAu nanostructure in our case and other previously reported catalysts towards ethanol in the alkaline solution.

| Catalyst                                           | ECSA-normalized activity ( $\text{mA}\cdot\text{cm}^{-2}$ ) | Mass-normalized activity                 | Reference |
|----------------------------------------------------|-------------------------------------------------------------|------------------------------------------|-----------|
| 22% $\text{YO}_x/\text{MoO}_x\text{-Pt}$ NWs       | 2.59                                                        | $1.63 \text{ A mg}_{\text{Pt}}^{-1}$     | 17        |
| Au/Pt nanodendrites                                | 30                                                          | /                                        | 18        |
| $\text{Pt}_3\text{Rh}_1\text{Ni}_2$ nanoassemblies | 8                                                           | $1.4 \text{ A mg}_{\text{metal}}^{-1}$   | 19        |
| Pt/NiCe <sub>4</sub>                               | /                                                           | $0.087 \text{ A mg}_{\text{Pt}}^{-1}$    | 20        |
| Pt/C                                               | 2.8                                                         | $0.770 \text{ A mg}_{\text{Pt}}^{-1}$    | This work |
| $\text{Ag}_{77}\text{Pt}_{23}$                     | 11.50                                                       | $0.663 \text{ A mg}_{\text{Au+Pt}}^{-1}$ | This work |
| $\text{Ag}_{45}\text{Pt}_{18}\text{Au}_{37}$       | 36.36                                                       | $0.764 \text{ A mg}_{\text{Au+Pt}}^{-1}$ | This work |
| $\text{Ag}_{21}\text{Pt}_{10}\text{Au}_{69}$       | 39.67                                                       | $1.9 \text{ A mg}_{\text{Au+Pt}}^{-1}$   | This work |
| $\text{Ag}_{11}\text{Pt}_5\text{Au}_{84}$          | 73.00                                                       | $2.29 \text{ A mg}_{\text{Au+Pt}}^{-1}$  | This work |

## References

1. J. Moulder, J. Chastain and R. King, *Chem. Phys. Lett.*, 1995, **220**, 7-10.
2. H. Mao, J. Feng, X. Ma, C. Wu and X. Zhao, *J Nanopart Res*, 2012, **14**, 1-15.
3. X. Fu, C. Wan, A. Zhang, Z. Zhao, H. Huyan, X. Pan, S. Du, X. Duan and Y. Huang, *Nano Res.*, 2020, **13**, 1472-1478.
4. J. Yang and J. Y. Ying, *Angew. Chem. Int. Ed.*, 2011, **50**, 4637-4643.
5. J. H. Kim, S. M. Choi, S. H. Nam, M. H. Seo, S. H. Choi and W. B. Kim, *Appl. Catal. B*, 2008, **82**, 89-102.
6. H. H. Li, S. Zhao, M. Gong, C. H. Cui, D. He, H. W. Liang, L. Wu and S. H. Yu, *Angew. Chem. Int. Ed.*, 2013, **52**, 7472-7476.
7. J. Sun, T. Li, X. Li, J. Pan, X. Hao and T. Zhu, *J. Alloys Compd.*, 2020, **831**, 154871.
8. P. Chandrasekhar, H. Elbohy, B. Vaggensmith, A. Dubey, K. M. Reza, V. K. Komarala and Q. Qiao, *Materials Today Energy*, 2017, **5**, 237-242.
9. J. Heo, D. S. Kim, Z. H. Kim, Y. W. Lee, D. Kim, M. Kim, K. Kwon, H. J. Park, S. Y. Wan and W. H. Sang, *Chem. Commun.*, 2008, **46**, 6120-6122.
10. Y. W. Lee, M. Kim, Z. H. Kim and S. W. Han, *J. Am. Chem. Soc.*, 2009, **131**, 17036-17037.
11. R. Sarkar, A. A. Farghaly and I. U. Arachchige, *Chem. Mater.*, 2022, **34**, 5874-5887.
12. X. Xie, G. Gao, S. Kang, T. Shibayama, Y. Lei, D. Gao and L. Cai, *Adv. Mater.*, 2015, **27**, 5573-5577.
13. Ding. T, Zhang. L, Li. H, Sun. Y and Yang. Q, *ACS Omega*, 2018, **3**, 17668-17675.
14. N. Sui, R. Yue, Y. Wang, Q. Bai, R. An, H. Xiao, L. Wang, M. Liu and W. W. Yu, *J. Alloys Compd.*, 2019, **790**, 792-798.
15. X. Yan, S. Yu, Y. Tang, D. Sun, L. Xu and C. Xue, *Nanoscale*, 2018, **10**, 2231-2235.
16. X. Ge, R. Wang, P. Liu and Y. Ding, *Chem. Mater.*, 2007, **19**, 5827-5829.
17. M. Li, Z. Zhao, W. Zhang, M. Luo, L. Tao, Y. Sun, Z. Xia, Y. Chao, K. Yin and Q. Zhang, *Adv. Mater.*, 2021, **33**, 2103762.
18. W. Chen, S. Luo, M. Sun, X. Wu, Y. Zhou, Y. Liao, M. Tang, X. Fan, B. Huang and Z. Quan, *Adv. Mater.*, 2022, **34**, 2206276.
19. H. Liu, J. Li, L. Wang, Y. Tang, B. Y. Xia and Y. Chen, *Nano Res.*, 2017, **10**, 3324-3332.
20. Z. Xu, L. Rao, H. Song, Z. Yan, L. Zhang and S. Yang, *Chinese. J. Catal.*, 2017, **38**, 305-312.
